# Supplementary material for: Gut Microbiota Altered in Mild Cognitive Impairment Compared With Normal Cognition in Sporadic Parkinson's Disease
Source: Front Neurol. 2020 Feb 25;11:137. doi: 10.3389/fneur.2020.00137 (PMC7052381; doi:10.3389/fneur.2020.00137)
Supplement: Supplementary file 1 [file Data_Sheet_1.zip]

Archive with 9 entries (9 files):
- Figure S1.PDF
- Figure S3.PDF
- Figure S4a.PDF
- Figure S4b.PDF
- Figure S4c.PDF
- Figure S5.PDF
- Figure S6.PDF
- Figure S7.PDF
- Figure S2.pdf
